# Supplementary material
Source: PubMed Central journal article supplement (PMC7076611)
Supplement: Supplemental_table_S1.pdf [file Supplemental_table_S1.pdf]

Supplemental Table S1. Statistical significance comparing S2PD “excellent” and “good” results against “poor” results

| Comparison                | P value  |
|---------------------------|----------|
| Neurorrhaphy vs autograft | 0.000136 |
| Neurorrhaphy vs allograft | 0.49474  |
| Neurorrhaphy vs conduit   | 0.736832 |
| Autograft vs allograft    | 0.00134  |
| Autograft vs conduit      | 0.00435  |
| Allograft vs conduit      | 0.728434 |
