# Supplementary material
Source: PubMed Central journal article supplement (PMC7076611)
Supplement: Supplemental_Table_S2.pdf [file Supplemental_Table_S2.pdf]

Supplemental Table S2. Statistical significance comparing M2PD “excellent” and “good” results against “poor” results

| Comparison                | P value  |
|---------------------------|----------|
| Neurorrhaphy vs allograft | 0.621189 |
| Neurorrhaphy vs conduit   | 0.000012 |
| Allograft vs conduit      | 0.000075 |
