# Supplementary material
Source: PubMed Central journal article supplement (PMC7076611)
Supplement: Supplemental_Table_S3.pdf [file Supplemental_Table_S3.pdf]

Supplemental Table S3. Statistical significance comparing SWMF “Normal” + “diminished light touch” + “diminished protective sensation” vs “loss of protective sensation” + “anesthetic”

| Comparison                | P value  |
|---------------------------|----------|
| Neurorrhaphy vs autograft | 0.00059  |
| Neurorrhaphy vs allograft | 0.086486 |
| Neurorrhaphy vs conduit   | 0.264886 |
| Autograft vs allograft    | 0.051576 |
| Autograft vs conduit      | 0.000013 |
| Allograft vs conduit      | 0.005564 |
