# Supplementary material
Source: PubMed Central journal article supplement (PMC7076611)
Supplement: Supplemental_Table_S4.pdf [file Supplemental_Table_S4.pdf]

Supplemental Table S4. Statistical significance comparing SWMF “Normal” vs “diminished light touch” + “diminished protective sensation” + “loss of protective sensation” + “anesthetic”

| Comparison                | P value  |
|---------------------------|----------|
| Neurorrhaphy vs autograft | 0.147487 |
| Neurorrhaphy vs allograft | 0.852369 |
| Neurorrhaphy vs conduit   | 0.029557 |
| Autograft vs allograft    | 0.103043 |
| Autograft vs conduit      | 0.446865 |
| Allograft vs conduit      | 0.018678 |
