# Supplementary material
Source: PubMed Central journal article supplement (PMC7076611)
Supplement: Supplemental_Table_S5.pdf [file Supplemental_Table_S5.pdf]

Supplemental Table S5. Statistical significance comparing SWMF “Normal” + “diminished light touch” + “diminished protective sensation” + “loss of protective sensation” vs “anesthetic”

| Comparison                | P value  |
|---------------------------|----------|
| Neurorrhaphy vs autograft | 0.030383 |
| Neurorrhaphy vs allograft | 0.774244 |
| Neurorrhaphy vs conduit   | 0.602168 |
| Autograft vs allograft    | 0.054381 |
| Autograft vs conduit      | 0.009444 |
| Allograft vs conduit      | 0.420596 |
